# Supplementary material for: Heat dissipative mechanical damping properties of EPDM rubber composites including hybrid fillers of aluminium nitride and boron nitride
Source: Royal Society of Chemistry journal article supplement (doi:10.1039/c9sm02123j), 2020-01-01
Supplement: c9sm02123j1.pdf [file c9sm02123j1.pdf]

## **Heat dissipative mechanical damping properties of EPDM rubber composites including hybrid fillers of aluminum nitride and boron nitride**

Jung Keun Cho<sup>a†</sup>, Hanna Sun<sup>b†</sup>, Hee Won Seo<sup>a</sup>, June Young Chung<sup>a</sup>, Mina Seol<sup>a</sup>, Sung-Hoon Kim<sup>a</sup>, Ra-Seong Kim<sup>d</sup>, In-Kyung Park<sup>a</sup>, Jonghwan Suhr<sup>a,b,c</sup>, Joon Chul Park<sup>e</sup>, Heon Seob Jung<sup>e</sup>, Hyun Ho Park<sup>e</sup>, Hyouk Ryeol Choi<sup>e</sup>, and Jae-Do Nam<sup>a,b\*</sup>

*<sup>a</sup>School of Chemical Engineering, Department of Polymer Science and Engineering, Sungkyunkwan University, Suwon 16419, Republic of Korea*

*<sup>b</sup>Department of Energy Science, Sungkyunkwan University, Suwon 16419, Republic of Korea*

*<sup>c</sup>School of Mechanical Engineering, Sungkyunkwan University, Suwon 16419, Republic of Korea*

*<sup>d</sup>SL TEST&FEA Team, Hwaseung R&A Co.,Ltd, Yangsan 50592, Republic of Korea*

*<sup>e</sup>Elastomer & Tribology Materials development team, Hyundai Motor Company, Hwaseong 18279, Republic of Korea*

---

\* Corresponding authors Phone number: +82-31-290-7285; Fax: +82-31-299-4069; E-mail address: [jdnam@skku.edu](mailto:jdnam@skku.edu)

† These authors equally contributed to this work.

Fig. S1 shows the digital images of dispersed hydrolyzed and silane-modified ceramic fillers (AlN and BN) at 1 min after vigorous shaking to determine the surface characteristics of the ceramic fillers, where hydrophilic characteristics would allow the fillers to be located in the water phase and *vice versa*. The hydrolyzed fillers are well dispersed in hydrophilic (water) solvent, which may stem from the formation of hydroxyl group on surface. On the other hand, the chemically-treated fillers are dispersed in hydrophobic toluene maintaining a clear phase separation because the number of hydroxyl groups of chemically-treated ceramic fillers is decreased by the reaction with hydrolyzed TESPT, giving rise to hydrophobic characteristics. It is clear that the surface characteristics of ceramic fillers are successfully changed.

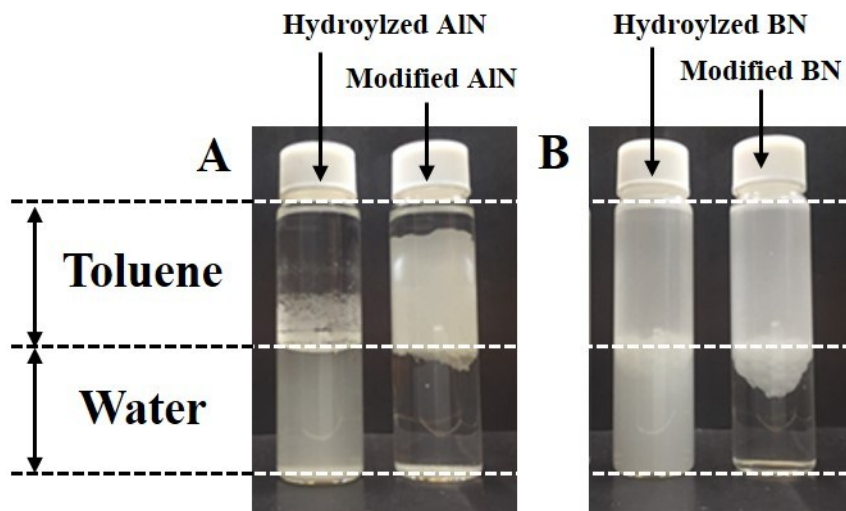

**Fig. S1.** A photographic image of chemically-treated (A) AlN and (B) BN dispersed in two different solvents, which are toluene (upper) and water (lower).
